# Supplementary material for: Relative Age in School and Suicide among Young Individuals in Japan: A Regression Discontinuity Approach
Source: PLOS journal article supplement (doi:10.1371/journal.pone.0135349), 2015-08-26
Supplement: S2 (10.1371/journal.pone.0135349.s002) [file journal.pone.0135349.s002]

S2 Table. Demographic Characteristics of the Population at Ages 16-25 who was Born in March and April, using the 2000 Census.

| 2000                                                                     | March    | April    | Total     |
|--------------------------------------------------------------------------|----------|----------|-----------|
| High School Student ( $16 \leq \text{Age} \leq 18$ )                     |          |          |           |
| % No                                                                     | 7.82     | 7.38     | 7.60      |
| % Yes                                                                    | 92.18    | 92.62    | 92.40     |
|                                                                          | (364813) | (357711) | (722524)  |
| College Student ( $19 \leq \text{Age} \leq 22$ )                         |          |          |           |
| % No                                                                     | 69.47    | 66.69    | 68.05     |
| % Yes                                                                    | 30.53    | 33.31    | 31.95     |
|                                                                          | (491754) | (511117) | (1002871) |
| College Student or Graduate ( $23 \leq \text{Age} \leq 25$ )             |          |          |           |
| % No                                                                     | 73.69    | 71.37    | 72.50     |
| % Yes                                                                    | 25.31    | 28.63    | 27.50     |
|                                                                          | (417905) | (437374) | (855279)  |
| Employment Status ( $16 \leq \text{Age} \leq 18$ and in the labor force) |          |          |           |
| % Unemployed                                                             | 19.62    | 18.07    | 18.83     |
| % Part-time                                                              | 43.53    | 43.37    | 43.45     |
| % Full-time                                                              | 32.93    | 34.81    | 33.90     |
| % Other                                                                  | 3.91     | 3.74     | 3.83      |
|                                                                          | (22800)  | (24036)  | (46836)   |
| Employment Status ( $19 \leq \text{Age} \leq 22$ and in the labor force) |          |          |           |
| % Unemployed                                                             | 11.18    | 10.51    | 10.84     |
| % Part-time                                                              | 24.33    | 25.01    | 24.67     |
| % Full-time                                                              | 61.57    | 61.55    | 61.56     |
| % Other                                                                  | 2.92     | 2.94     | 2.93      |
|                                                                          | (264855) | (268764) | (533529)  |
| Employment Status ( $23 \leq \text{Age} \leq 25$ and in the labor force) |          |          |           |
| % Unemployed                                                             | 8.68     | 8.34     | 8.50      |
| % Part-time                                                              | 11.79    | 11.35    | 11.57     |
| % Full-time                                                              | 76.02    | 76.62    | 76.33     |
| % Other                                                                  | 3.51     | 3.69     | 3.60      |
|                                                                          | (340609) | (355155) | (695764)  |
| Industry (Age > 15 and employed)                                         |          |          |           |
| % Agriculture, Forestry, and Fisheries                                   | 0.94     | 0.84     | 0.89      |
| % Mining, Construction, Production                                       | 26.61    | 26.33    | 26.69     |
| % Service                                                                | 72.45    | 72.84    | 72.65     |
|                                                                          | (542066) | (560741) | (1102807) |

Note: Values in parentheses indicate the number of observations for each group of the sample. All of the differences in the values between the March and April samples are statistically significant with a chi-square test. The data include all Japanese citizens at ages 16-25 as of October in 2000. "Other" in the employment category includes those who are self-employed, work for family business, or work at home. Source: the 2000 Population Census of Japan.
